# Supplementary material for: Structure–Function Relationship of Retinal Ganglion Cells in Multiple Sclerosis
Source: PubMed Central journal article supplement (PMC8037992; doi:10.3390/ijms22073419), 2021-03-26
Supplement: ijms-22-03419-s001.pdf [file ijms-22-03419-s001.pdf]

Table S1. Correlation analysis of mfPERG vs structural tests.

| <b>N1 Amplitude [<math>\mu\text{V}</math>]</b> |             |             |             |             |
|------------------------------------------------|-------------|-------------|-------------|-------------|
| r Pearson correlation, P unadjusted            |             |             |             |             |
| Thickness [ $\mu\text{m}$ ]                    | Ring1       | Ring 2      | Ring 3      | Ring 4      |
| cORL                                           | 0.37, 0.024 | 0.34, 0.037 | 0.27, 0.11  | 0.14, 0.42  |
| pfORL                                          | 0.28, 0.09  | 0.32, 0.057 | 0.36, 0.03  | 0.17, 0.32  |
| pOR                                            | 0.19, 0.25  | 0.19, 0.25  | 0.29, 0.08  | 0.15, 0.39  |
| cONL                                           | -0.18, 0.28 | -0.21, 0.20 | -0.12, 0.49 | -0.01, 0.96 |
| pfONL                                          | -0.16, 0.33 | -0.27, 0.10 | -0.11, 0.50 | 0.003, 0.99 |
| pONL                                           | -0.14, 0.40 | -0.27, 0.10 | -0.12, 0.49 | 0.02, 0.89  |

  

| <b>P1 Amplitude [<math>\mu\text{V}</math>]</b> |             |             |              |             |
|------------------------------------------------|-------------|-------------|--------------|-------------|
| r Pearson correlation, P unadjusted            |             |             |              |             |
| Thickness [ $\mu\text{m}$ ]                    | Ring1       | Ring 2      | Ring 3       | Ring 4      |
| cORL                                           | -0.16, 0.36 | -0.25, 0.13 | -0.29, 0.08  | -0.05, 0.76 |
| pfORL                                          | -0.29, 0.08 | -0.38, 0.02 | -0.39, 0.018 | -0.17, 0.32 |
| pOR                                            | -0.28, 0.09 | -0.26, 0.11 | -0.30, 0.07  | -0.15, 0.38 |
| cONL                                           | 0.03, 0.88  | 0.15, 0.38  | 0.13, 0.45   | 0.07, 0.67  |
| pfONL                                          | 0.13, 0.45  | 0.20, 0.24  | 0.14, 0.40   | 0.02, 0.92  |
| pONL                                           | 0.19, 0.26  | 0.20, 0.22  | 0.11, 0.51   | -0.03, 0.87 |
| cINL                                           | 0.06, 0.72  | -0.05, 0.57 | -0.15, 0.39  | -0.22, 0.19 |
| pfINL                                          | 0.36, 0.03  | 0.30, 0.07  | 0.07, 0.68   | 0.06, 0.74  |
| pINL                                           | 0.35, 0.036 | 0.31, 0.06  | 0.37, 0.026  | 0.40, 0.015 |

  

| <b>N2 Amplitude [<math>\mu\text{V}</math>]</b> |              |             |             |              |
|------------------------------------------------|--------------|-------------|-------------|--------------|
| r Pearson correlation, P unadjusted            |              |             |             |              |
| Thickness [ $\mu\text{m}$ ]                    | Ring1        | Ring 2      | Ring 3      | Ring 4       |
| pRNFL G                                        | -0.26, 0.12  | -0.16, 0.34 | -0.24, 0.16 | -0.36, 0.026 |
| pRNFL PMB                                      | -0.33, 0.051 | -0.13, 0.46 | 0.001, 0.99 | 0.18, 0.30   |
| pRNFL T                                        | -0.31, 0.07  | -0.12, 0.50 | -0.05, 0.77 | 0.08, 0.67   |
| cINL                                           | 0.13, 0.43   | 0.17, 0.32  | 0.26, 0.12  | 0.27, 0.11   |
| pfINL                                          | -0.12, 0.47  | -0.17, 0.30 | -0.02, 0.86 | -0.01, 0.95  |
| pINL                                           | -0.32, 0.051 | -0.38, 0.02 | -0.38, 0.02 | -0.42, 0.01  |
| cIPL                                           | 0.11, 0.53   | 0.12, 0.48  | 0.16, 0.34  | 0.26, 0.12   |
| pfIPL                                          | -0.25, 0.14  | -0.08, 0.63 | 0.013, 0.94 | 0.04, 0.83   |
| pIPL                                           | -0.39, 0.017 | -0.20, 0.23 | -0.17, 0.31 | -0.24, 0.15  |
| cGCL                                           | 0.14, 0.42   | 0.18, 0.29  | 0.23, 0.18  | 0.33, 0.045  |
| pfGCL                                          | -0.28, 0.09  | -0.11, 0.54 | -0.07, 0.67 | 0.07, 0.68   |
| pGCL                                           | -0.47, 0.003 | -0.28, 0.09 | -0.29, 0.08 | -0.27, 0.11  |
| cGCIPL                                         | 0.13, 0.46   | 0.16, 0.36  | 0.20, 0.23  | 0.33, 0.07   |
| pfGCIPL                                        | -0.27, 0.10  | -0.10, 0.56 | -0.04, 0.81 | 0.06, 0.73   |
| pGCIPL                                         | -0.45, 0.005 | -0.25, 0.13 | -0.25, 0.14 | -0.26, 0.12  |
| cMRNFL                                         | 0.08, 0.62   | 0.15, 0.39  | 0.28, 0.09  | 0.27, 0.11   |
| pfMRNFL                                        | 0.11, 0.53   | 0.16, 0.33  | 0.25, 0.14  | 0.18, 0.29   |
| pMRNFL                                         | -0.14, 0.41  | -0.06, 0.74 | -0.06, 0.71 | -0.07, 0.67  |

mfPERG amplitudes are converted to positive values.  
pRNFL= average peripapillary retinal nerve fiber layer thickness;  
G: averaged, PMB: papillomacular bundle, T: Temporal sector.  
A suffix of c, pf, and p: central, parafoveal and perifoveal rings of ETDRS macular scans; ORL: Outer retinal layer; ONL= Outer nuclear layer;  
INL: Inner nuclear layer; IPL: Inner plexiform layer; GCL: Ganglion cell layer;  
GCIPL; ganglion cell inner plexiform layer;  
MRNFL= macular retinal nerve fiber layer.
